# Supplementary material
Source: PubMed Central journal article supplement (PMC4311766)
Supplement: NIHMS643153-supplement-01.pdf [file NIHMS643153-supplement-01.pdf]

**Table S7:** iTRAQ values for selected proteins used in clustering ovarian cancer cell lines

| <b>GENE</b>                                            | <b>CAOV-1</b> | <b>COLO316</b> | <b>OVCAR-3</b> | <b>OVCAR-5</b> | <b>CAOV-3</b> | <b>HOSE6-3</b> | <b>PA-1</b> | <b>A2780</b> |
|--------------------------------------------------------|---------------|----------------|----------------|----------------|---------------|----------------|-------------|--------------|
| <b>IC50<br/>(<math>\mu\text{g}/\mu\text{l}</math>)</b> | <b>85</b>     | <b>47</b>      | <b>74</b>      | <b>35</b>      | <b>20</b>     | <b>12</b>      | <b>6.5</b>  | <b>5.5</b>   |
| <b>CAT</b>                                             | 1.18          | 0.75           | 1.06           | 1.16           | 0.81          | 0.07           | 0.47        | 0.29         |
| <b>PAK2</b>                                            | 1.20          | 1.18           | 1.20           | 0.88           | 0.68          | 1.40           | 0.73        | 0.48         |
| <b>TXNDC17</b>                                         | 1.76          | 1.23           | 1.109          | 1.32           | 0.65          | 0.65           | 0.48        | 0.50         |
| <b>RCC1</b>                                            | 1.12          | 0.63           | 0.70           | 1.38           | 0.48          | 0.65           | 0.34        | 0.24         |
| <b>PFAS</b>                                            | 1.51          | 1.60           | 0.79           | 1.54           | 0.50          | 0.99           | 0.38        | 0.36         |
| <b>ILF2</b>                                            | 0.90          | 1.03           | 1.00           | 1.21           | 0.66          | 0.90           | 0.67        | 0.74         |
| <b>TXNDC5</b>                                          | 0.83          | 1.07           | 0.97           | 0.95           | 0.52          | 0.59           | 0.53        | 0.58         |
| <b>PDHB</b>                                            | 1.13          | 0.79           | 0.98           | 1.54           | 1.51          | 0.82           | 0.91        | 0.91         |
| <b>MSH6</b>                                            | 1.27          | 0.87           | 0.49           | 1.18           | 1.30          | 1.26           | 0.40        | 0.71         |
| <b>CD44</b>                                            | 1.23          | 1.19           | 1.15           | 0.37           | 0.71          | 1.74           | 1.02        | 0.78         |
| <b>MCM5</b>                                            | 0.85          | 0.81           | 0.92           | 1.27           | 1.39          | 0.90           | 1.10        | 0.82         |
| <b>IDH1</b>                                            | 0.68          | 0.54           | 1.40           | 0.62           | 0.91          | 0.63           | 1.38        | 2.34         |
| <b>RPA1</b>                                            | 0.91          | 0.87           | 1.14           | 1.54           | 1.48          | 0.72           | 2.66        | 2.64         |
| <b>MCM2</b>                                            | 0.62          | 0.65           | 0.84           | 0.70           | 1.27          | 0.79           | 3.41        | 0.95         |
| <b>RPA3</b>                                            | 0.84          | 0.75           | 0.64           | 1.08           | 1.13          | 0.79           | 2.20        | 2.40         |
| <b>API5</b>                                            | 1.02          | 1.19           | 1.07           | 1.93           | 2.38          | 0.74           | 2.00        | 3.46         |
| <b>RPA2</b>                                            | 0.79          | 0.90           | 1.17           | 1.00           | 1.92          | 0.89           | 2.29        | 2.51         |
| <b>ALDH2</b>                                           | 0.59          | 0.65           | 1.21           | 0.67           | 2.66          | 0.91           | 1.22        | 2.32         |
| <b>RAB14</b>                                           | 0.81          | 0.71           | 1.39           | 0.90           | 1.38          | 0.78           | 1.81        | 2.48         |

\*iTRAQ data for a subset of selected proteins (Redox regulation, DNA repair and ovarian cancer related) from the MAD-filtered 300 proteins used in clustering chemosensitivity in ovarian cancer cell lines. iTRAQ values are presented in order of heatmap clustering (Figure 3 and Table S6). Carboplatin IC50 values per cell line are shown.
