# Supplementary material
Source: PubMed Central journal article supplement (PMC4311766)

# Fan\_Wrzeszczynski et al. Fig S1

**Cell-line: HOSE 6-3**

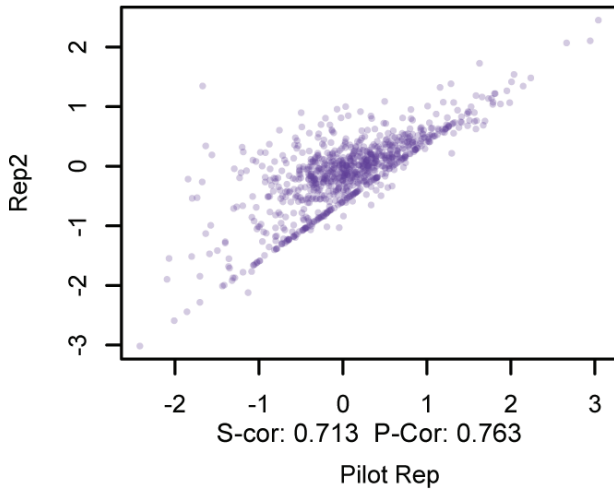

**Cell-line: OVCAR-3**

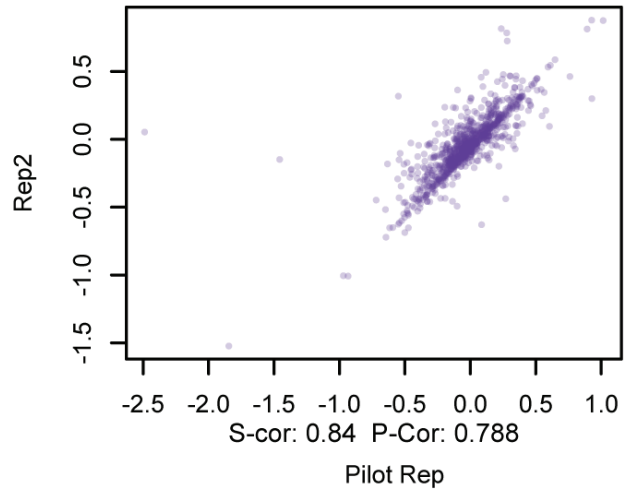

**Cell-line: PA-1**

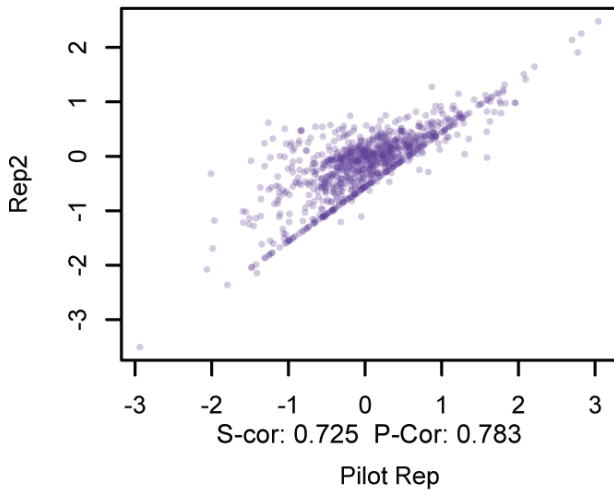

**Cell-line: CAOV-4**

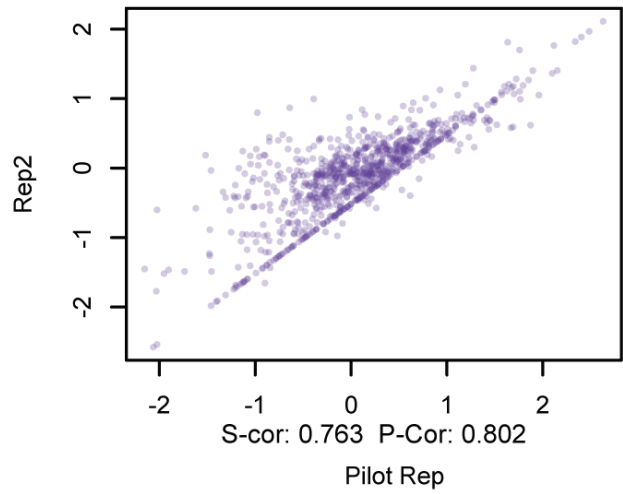

**Cell-line: CAOV-3**

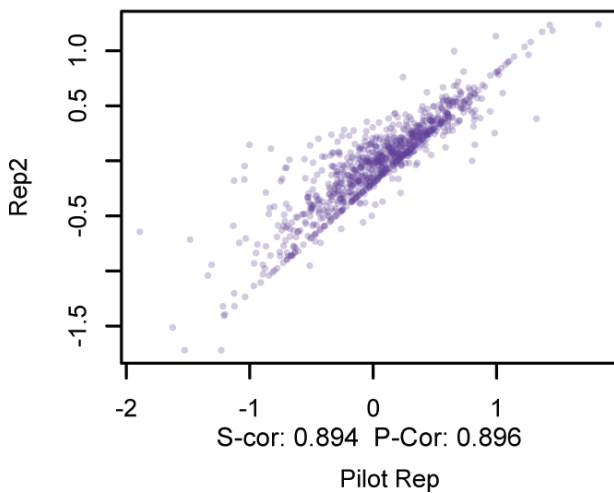

**Cell-line: A2780**

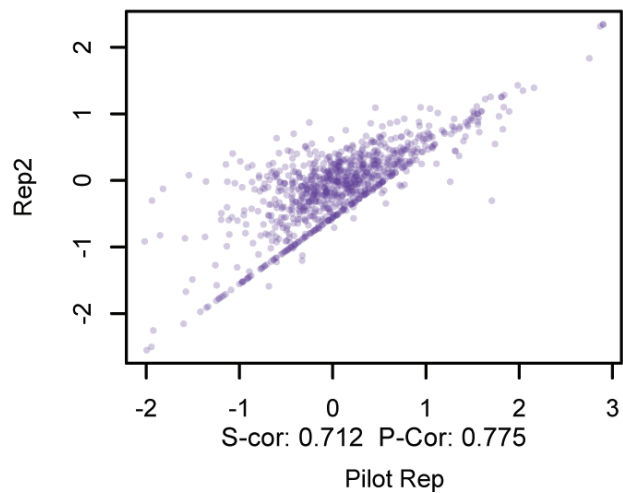

Supplement: NIHMS643153-supplement-Figure_S1.pdf [file NIHMS643153-supplement-Figure_S1.pdf]
